# Supplementary material for: Prognostic Value of the Serum Creatinine-to-Albumin Ratio for Short-term and Long-term Mortality Among Patients with Aortic Aneurysm: A Retrospective Cohort Study Running title: Creatinine-to-albumin ratio predicts mortality in patients with aortic aneurysms
Source: Research Square preprint supplement (doi:10.21203/rs.3.rs-6935801/v1), 2025-08-19
Supplement: Supplementary file 1 [file 4404d1d53f5579cbcbf905b8.docx]

| Icd version | Icd code | Long title |
| --- | --- | --- |
| 9 | 4411 | Thoracic aneurysm, ruptured |
|  | 4412 | Thoracic aneurysm without mention of rupture |
|  | 4413 | Abdominal aneurysm, ruptured |
|  | 4414 | Abdominal aneurysm without mention of rupture |
|  | 4416 | Thoracoabdominal aneurysm, ruptured |
|  | 4417 | Thoracoabdominal aneurysm, without mention of rupture |
|  | 4420 | Aneurysm of artery of upper extremity |
|  | 4422 | Aneurysm of iliac artery |
|  | 4423 | Aneurysm of artery of lower extremity |
| 10 | I711 | Thoracic aortic aneurysm, ruptured |
|  | I712 | Thoracic aortic aneurysm, without rupture |
|  | I713 | Abdominal aortic aneurysm, ruptured |
|  | I714 | Abdominal aortic aneurysm, without rupture |
|  | I715 | Thoracoabdominal aortic aneurysm, ruptured |
|  | I716 | Thoracoabdominal aortic aneurysm, without rupture |
|  | I718 | Aortic aneurysm of unspecified site, ruptured |
|  | I719 | Aortic aneurysm of unspecified site, without rupture |
|  | I721 | Aneurysm of artery of upper extremity |
|  | I723 | Aneurysm of iliac artery |
|  | I724 | Aneurysm of artery of lower extremity |
